# Supplementary material
Source: PubMed Central journal article supplement (PMC3517096)
Supplement: supp_125.20.4902_JCS111237.pdf [file supp_125.20.4902_JCS111237.pdf]

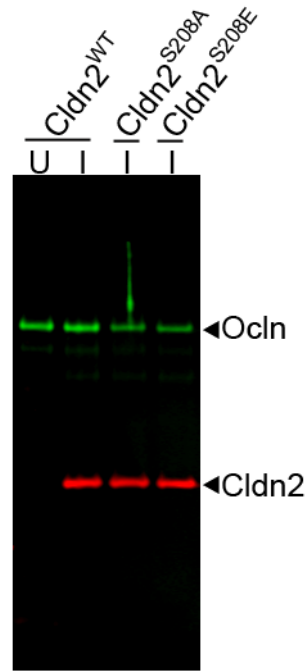

**Fig. S1.** Treatment of stably transfected MDCK II cells with claudin-2 S208A and S208E with 0.05ng/ml doxycycline results in transgene induction to equivalent levels (U=uninduced, I=induced); ratio of transgene to occludin is 3.4 for S208A and 3.2 for S208E.

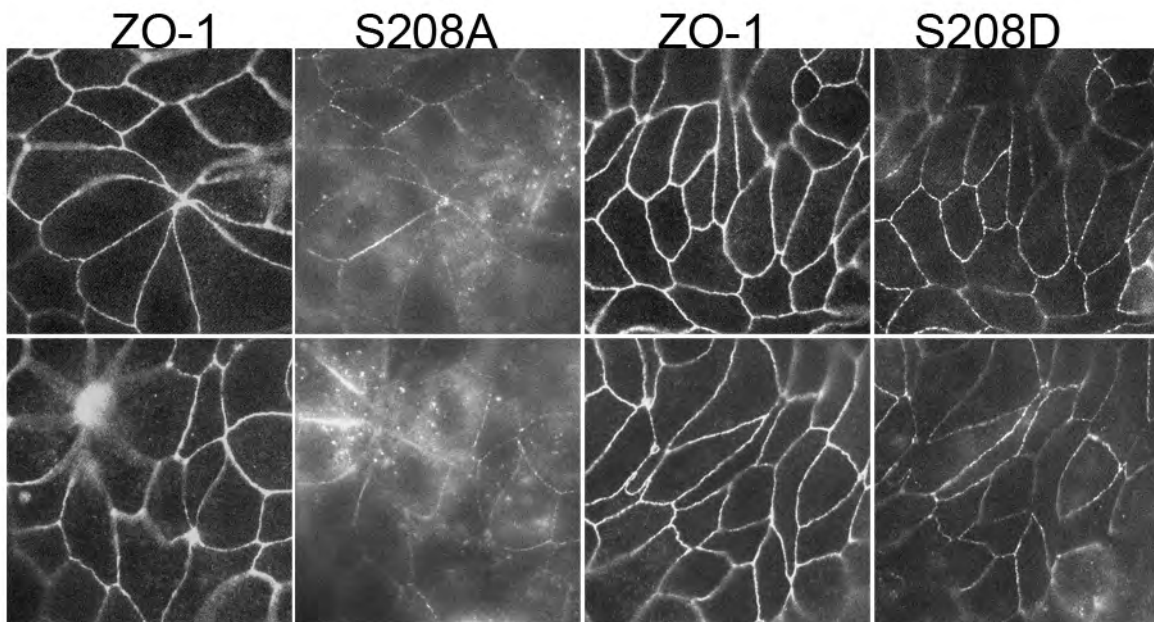

**Fig. S2.** Like S208E, claudin-2 S208D localizes to cell-cell contacts better than non-phosphorylatable claudin-2 mutant S208A. (Left 4 panels) ZO-1 immunofluorescence marks cell contacts while claudin-2 S208A is localized to cell contacts but also to abundant intracellular puncta. In contrast, (Right 4 panels) both ZO-1 and claudin-2 S208D are largely localized to cell membranes.

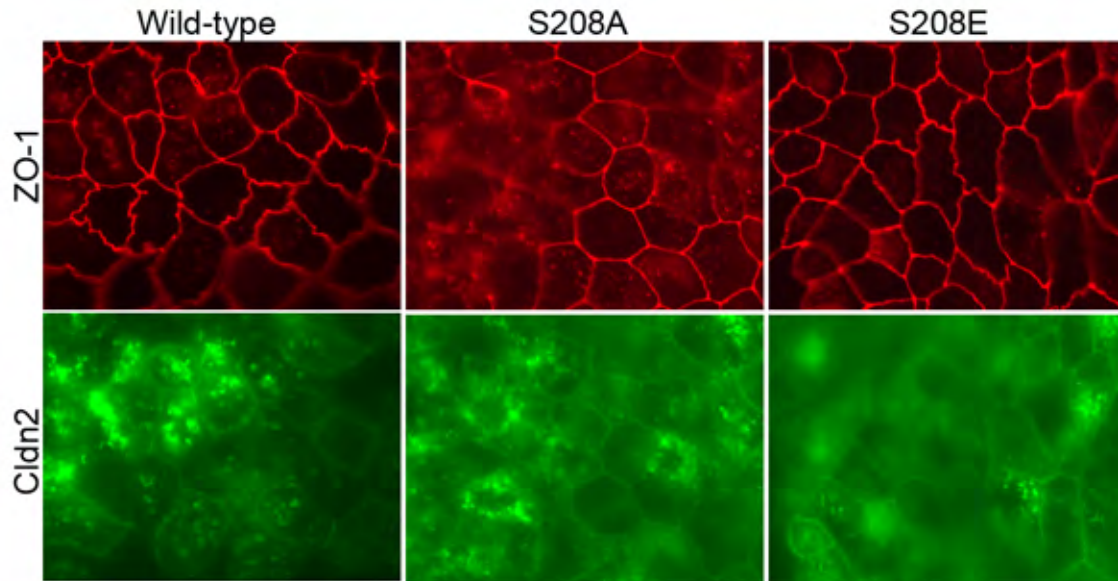

**Fig. S3.** Maximal induction of wild-type claudin-2 (left panels), S208A (middle) and S208E (right) mutants results in similar localization to both cell contacts and intracellular vesicles for all claudin forms. ZO-1 localization is mostly unaffected, although there is a small increase in intracellular accumulation in all clones.

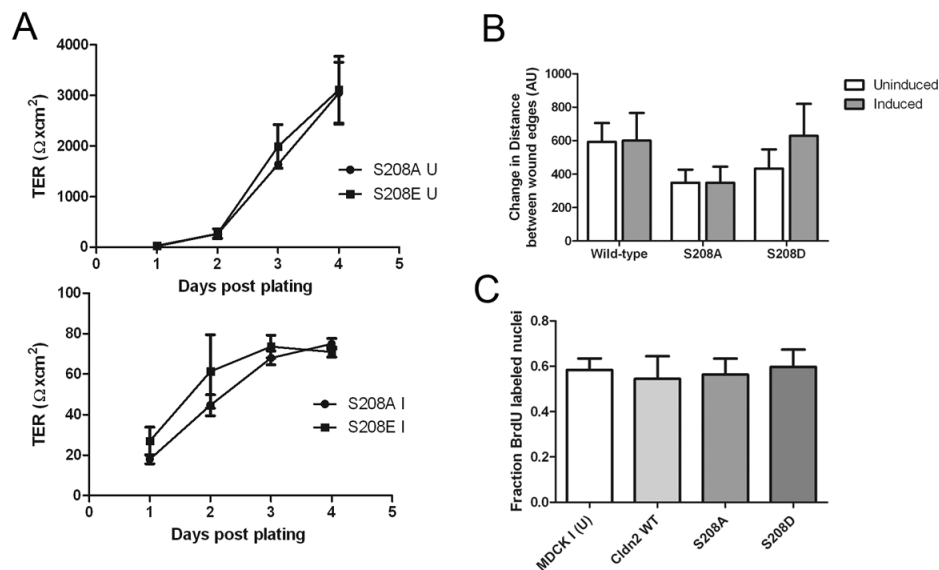

**Fig. S4.** Expression of claudin-2 S208 mutants has little effect on physiologic parameters. (A) MDCK I Tet-off cells not induced to express claudin-2 mutants develop normal TER levels over 4 days in culture to approximately  $3000 \Omega \text{cm}^2$  (top panel), while cells induced to express either claudin-2 S208A or S208E develop maximal TER below  $100 \Omega \text{cm}^2$  over a similar time course. (B) MDCK I Tet-off cells inducibly expressing wild-type claudin-2 or S208A or S208E mutants show similar wound healing behavior independent of claudin-2 induction. (C) Uninduced MDCK I cells or cells induced to express wild-type claudin-2 or S208A or S208E mutants show identical levels of nuclear labeling for BrdU.

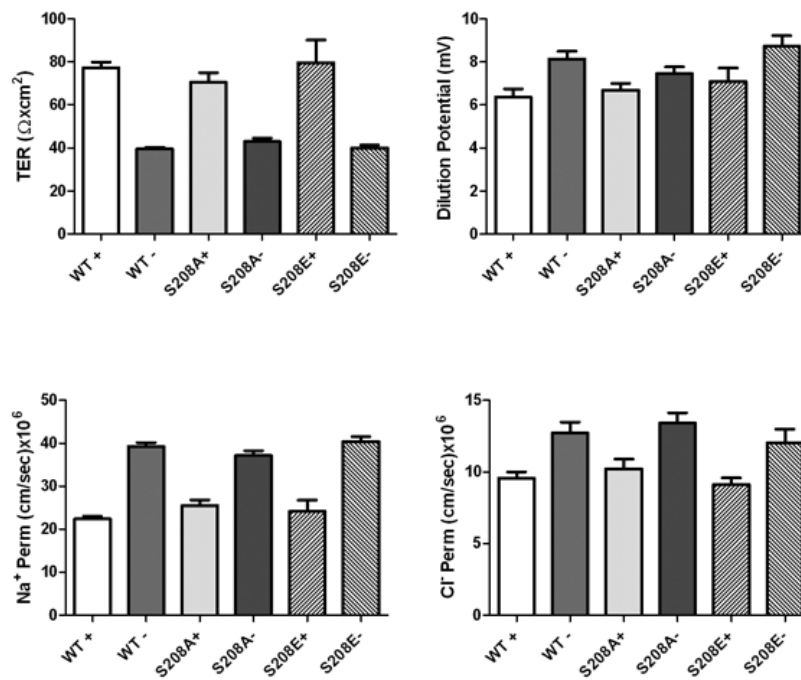

**Fig. S5.** Induction of wild-type claudin-2, S208A and S208E in claudin-2 KD background results in similar changes in TER, dilution potential and Na<sup>+</sup> and Cl<sup>-</sup> permeability.

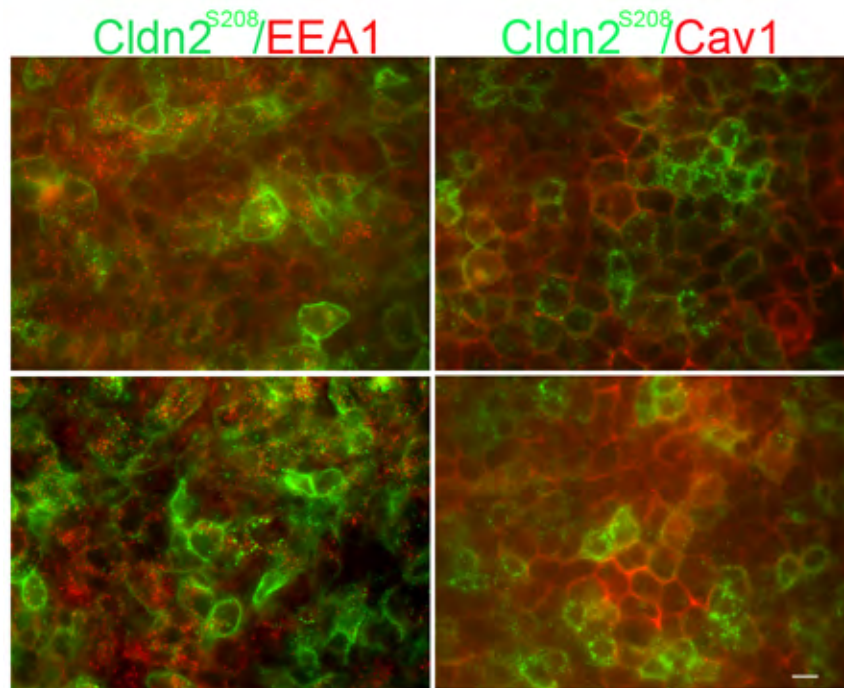

**Fig. S6.** Immunofluorescent analysis of the localization of claudin-2 S208 (green and the endosomal marker EEA-1 (red, left) or with caveolin-1 (red, right) does not reveal significant colocalization; two examples of each (top and bottom) is shown.

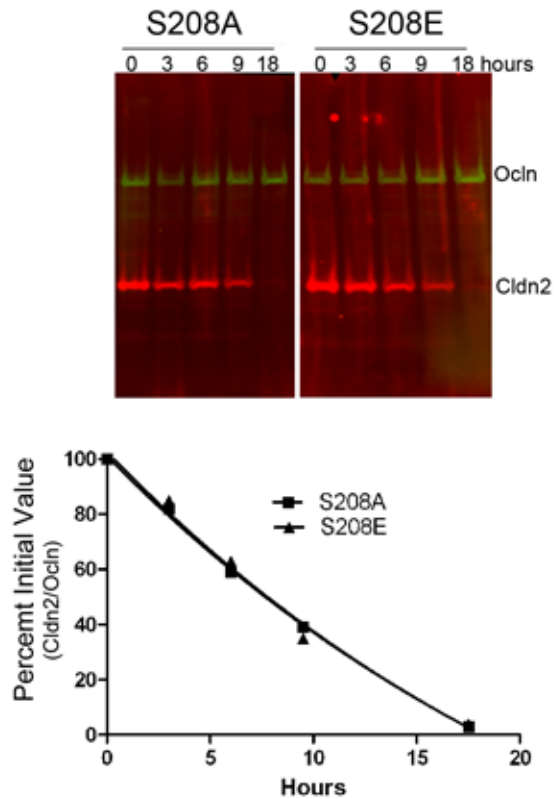

**Fig. S7.** Half-lives of claudin-2 S208A and S208E mutants are identical. Stable cell lines expressing each mutant were induced for 4 days in the absence of doxycycline; at time=0 50ng/ml doxycycline was added and cells were collected at the indicated intervals. Samples were immunoblotted for claudin-2 and occludin and the ratio of claudin-2/occludin plotted. This experiment was repeated three times with different mutant clones with similar results.

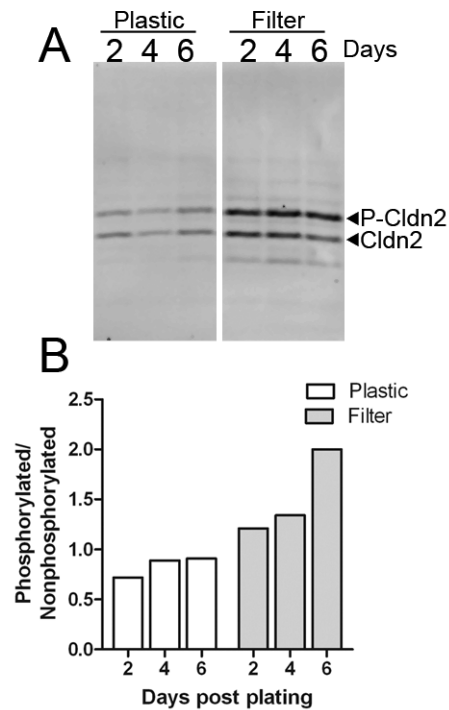

**Fig. S8.** Wild-type MDCK II cells were plated at  $5 \times 10^4$  cells/cm<sup>2</sup> on 24-well tissue culture plates or transwell filters and collected at the indicated times. Samples were immunoblotted for claudin-2 after phos-tag gel electrophoresis (A) and the ratio of phosphorylated to nonphosphorylated claudin-2 was determined.

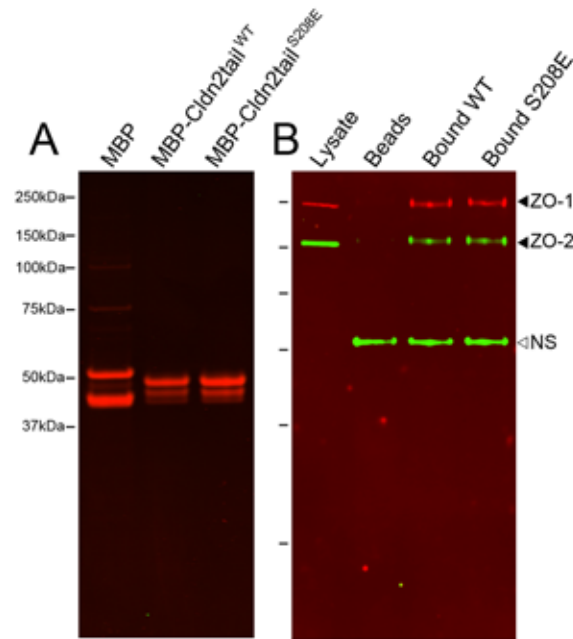

**Fig. S9.** Phosphorylation state does not alter interaction of claudin-2 with ZO-1 or ZO-2. (A) SDS-PAGE of bacterially-expressed, metal affinity resin-purified fusion proteins; left, MBP, middle, MBP-tail claudin-2, right MBP tail claudin-2 S208E. (B) Immunoblot for ZO-1 (red) and ZO-2 (green) after fusion protein pull-down; left lane, MDCK II lysate; Beads, non specific binding to MBP alone; Bound WT, ZO-1 and ZO-2 bound to MBP-cld2, Bound S208E, ZO-1 and ZO-2 bound to MBP-mutant cldn2. NS, non-specific band binding to all fusion proteins.

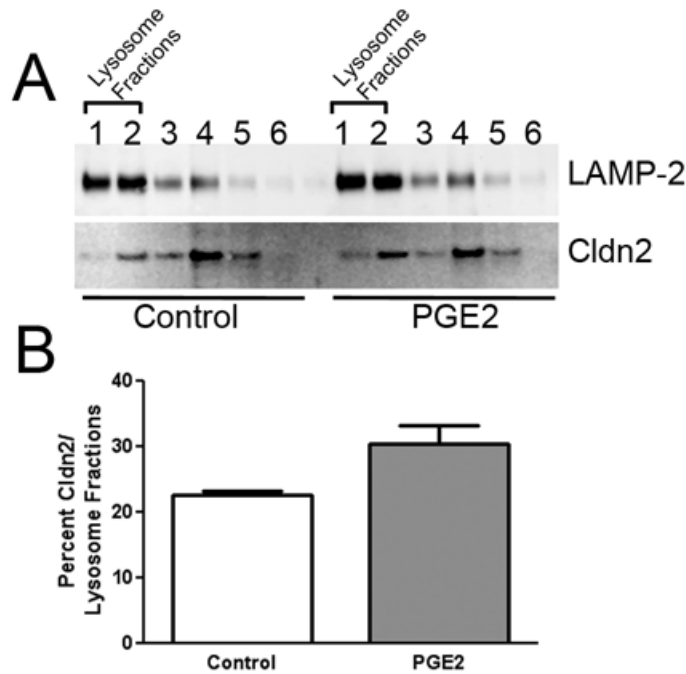

**Fig. S10.** PGE2 treatment of MDCK II cells results in a small but reproducible shift of claudin-2 into the lysosome fractions. MDCK II cells were cultured on 6-well Transwell filters for 4 days and treated with 1  $\mu$ M PGE2 for 60 min. Monolayers were washed with PBS and 3 filters of control and treated cells were combined for gradient fractionation. (A) Gradient fractions were subjected to SDS PAGE and immunoblotted for LAMP-2 (top panel) and claudin-2 (lower panel). (B) The amount of claudin-2 in the each fraction was quantified and the percent in the two fractions with the most LAMP-2, were compared between the control and PGE2 treated samples.

**Table S1.** The percent of serine plus threonine (S/T), proline (P), tyrosine (Y), arginine plus lysine (R/K), glutamic acid plus aspartic acid (E/D) and the isoelectric point (PI) for the whole of several mouse claudins with the C-terminal tail is compared.

|         | <u>%S/T<br/>overall</u> | <u>%S/T tail</u> | <u>%P overall</u> | <u>%P tail</u> | <u>%Y overall</u> | <u>%Y tail</u> | <u>%R/K<br/>overall</u> | <u>%R/K tail</u> | <u>%E/D<br/>overall</u> | <u>%E/D tail</u> | <u>PI overall</u> | <u>PI tail</u> |
|---------|-------------------------|------------------|-------------------|----------------|-------------------|----------------|-------------------------|------------------|-------------------------|------------------|-------------------|----------------|
| cldn1   | 14.6                    | 25.92            | 8.06              | 25.92          | 4.7               | 11.11          | 4.27                    | 18.51            | 6.16                    | 3.703            | 7.91              |                |
| cldn2   | 16.52                   | 22.72            | 3.91              | 9.09           | 4.35              | 11.36          | 5.65                    | 11.36            | 4.78                    | 4.54             | 7.93              |                |
| cldn3   | 13.25                   | 21.21            | 4.57              | 9.09           | 3.2               | 12.12          | 6.4                     | 18.18            | 5.48                    | 9.09             | 7.77              |                |
| cldn4   | 14.33                   | 21.73            | 3.81              | 8.69           | 2.86              | 13.04          | 6.19                    | 17.39            | 4.28                    | 4.34             | 8.3               |                |
| cldn5   | 10.55                   | 12.5             | 4.59              | 12.5           | 3.67              | 9.37           | 5.96                    | 18.75            | 4.58                    | 9.37             | 7.92              |                |
| cldn6   | 14.16                   | 21.875           | 3.65              | 12.5           | 3.65              | 12.5           | 5.48                    | 9.375            | 4.11                    | 3.12             | 7.96              |                |
| cldn7   | 13.74                   | 24               | 3.79              | 8              | 3.79              | 12             | 7.11                    | 20               | 4.27                    | 8                | 8.72              |                |
| cldn8   | 13.78                   | 28.94            | 2.67              | 5.26           | 3.56              | 10.52          | 8.89                    | 18.42            | 6.23                    | 5.26             | 8.56              |                |
| cldn9   | 11.06                   | 11.42            | 4.15              | 14.28          | 2.3               | 5.71           | 5.99                    | 17.14            | 6.99                    | 8.57             | 6.97              |                |
| cldn10a | 15.72                   | 22.44            | 2.18              | 6.12           | 3.93              | 6.12           | 8.3                     | 14.28            | 4.8                     | 8.16             | 8.71              |                |
| cldn11  | 13.53                   | 29.62            | 3.86              | 3.7            | 3.86              | 11.11          | 5.8                     | 7.4              | 4.35                    | 7.4              | 7.9               |                |
| cldn12  | 15.99                   | 26.08            | 4.1               | 10.86          | 4.1               | 6.52           | 6.97                    | 4.34             | 4.51                    | 4.34             | 8.47              |                |
| cldn14  | 15.9                    | 17.85            | 5.44              | 14.28          | 4.6               | 10.71          | 7.11                    | 10.71            | 3.35                    | 7.14             | 8.88              |                |
| cldn15  | 17.18                   | 23.4             | 3.08              | 6.38           | 4.41              | 6.38           | 5.72                    | 10.63            | 5.28                    | 10.63            | 7.51              |                |
| cldn16  | 12.39                   | 13.33            | 3.42              | 8.88           | 5.13              | 11.11          | 8.55                    | 20               | 8.54                    | 8.88             | 6.94              |                |
| cldn17  | 9.82                    | 13.51            | 4.46              | 10.81          | 3.57              | 8.1            | 8.48                    | 21.62            | 4.92                    | 5.4              | 9.15              |                |
| cldn18  | 15.15                   | 16.66            | 2.27              | 4.54           | 3.79              | 6.06           | 6.44                    | 15.15            | 5.69                    | 10.6             | 7.87              |                |
| Average | 13.98                   | 20.78            | 4.00              | 10.05          | 3.85              | 9.64           | 6.66                    | 14.9             | 5.19                    | 6.97             | 8.08              |                |

Table S1. Comparison of overall claudin amino acid composition with the composition of the C-terminal tail
